# Supplementary material for: Bioaccumulation of Non-Essential Trace Elements Detected in Women’s Follicular Fluid, Urine, and Plasma Is Associated with Poor Reproductive Outcomes following Single Euploid Embryo Transfer: A Pilot Study
Source: MDPI journal article supplement (doi:10.3390/ijms241713147), 2023-08-24
Supplement: s1 [file s1]

**Supplementary Table S2. Non-essential trace metal concentrations in follicular fluid, plasma, and urine measured by Inductively Coupled Plasma Mass Spectrometry (ICP-MS).  
Supplementary data from Main Table 2.**

|                          | Minimum | 25%    | 50%    | 75%    | Maximum |
|--------------------------|---------|--------|--------|--------|---------|
| Follicular Fluid (ng/mL) |         |        |        |        |         |
| Barium (Ba)              | 0.50    | 1.50   | 2.00   | 2.70   | 11.10   |
| Strontium (Sr)           | 9.00    | 22.27  | 28.79  | 32.60  | 45.00   |
| Rubidium (Rb)            | 46.00   | 108.50 | 124.00 | 130.25 | 171.00  |
| Arsenic (As)             | 0.50    | 0.50   | 0.50   | 0.50   | 7.08    |
| Tin (Sn)                 |         |        |        |        |         |
| Cesium (Cs)              |         |        |        |        |         |
| Mercury (Hg)             | 0.10    | 1.22   | 1.76   | 2.81   | 14.90   |
| Titanium (Ti)            | 1.40    | 2.20   | 2.55   | 3.03   | 6.10    |
| Lead (Pb)                | 0.50    | 0.50   | 0.50   | 0.50   | 2.37    |
| Antimony (Sb)            |         |        |        |        |         |
| Plasma (ng/mL)           |         |        |        |        |         |
| Barium (Ba)              | 15.97   | 20.70  | 22.86  | 26.65  | 953.79  |
| Strontium (Sr)           | 22.90   | 32.03  | 38.30  | 44.41  | 73.36   |
| Rubidium (Rb)            | 194.28  | 268.64 | 306.64 | 488.42 | 959.40  |
| Arsenic (As)             | 2.50    | 3.61   | 4.11   | 5.20   | 8.22    |
| Tin (Sn)                 | 5.25    | 6.67   | 8.07   | 14.22  | 33.21   |
| Cesium (Cs)              | 1.97    | 2.47   | 3.03   | 3.62   | 53.16   |
| Mercury (Hg)             | 0.59    | 1.08   | 1.67   | 2.80   | 5.00    |
| Titanium (Ti)            | 94.24   | 426.40 | 618.05 | 887.93 | 1697.53 |
| Lead (Pb)                | 2.58    | 3.24   | 4.20   | 5.22   | 11.14   |
| Antimony (Sb)            | 2.50    | 6.80   | 9.63   | 13.56  | 38.56   |

| Urine                         |        |        |         |         |         |
|-------------------------------|--------|--------|---------|---------|---------|
| Barium (Ba) (ng/mL)           | 0.25   | 0.81   | 1.31    | 2.47    | 19.99   |
| <i>CR corrected</i> (µg/g CR) | 0.001  | 0.010  | 0.019   | 0.031   | 0.102   |
| Strontium (Sr) (ng/mL)        | 9.56   | 49.28  | 88.56   | 150.43  | 477.11  |
| <i>CR corrected</i> (µg/g CR) | 0.103  | 0.590  | 1.092   | 1.519   | 3.996   |
| Rubidium (Rb) (ng/mL)         | 110.84 | 807.99 | 1161.52 | 2039.44 | 3515.73 |
| <i>CR corrected</i> (µg/g CR) | 5.002  | 9.605  | 12.028  | 17.490  | 57.879  |
| Arsenic (As) (ng/mL)          | 0.25   | 5.94   | 12.59   | 28.29   | 345.52  |
| <i>CR corrected</i> (µg/g CR) | 0.009  | 0.066  | 0.126   | 0.303   | 3.709   |
| Tin (Sn) (ng/mL)              | 0.25   | 0.50   | 0.92    | 1.59    | 5.75    |
| <i>CR corrected</i> (µg/g CR) | 0.001  | 0.006  | 0.011   | 0.018   | 0.108   |
| Cesium (Cs) (ng/mL)           | 0.58   | 4.04   | 5.94    | 10.13   | 15.97   |
| <i>CR corrected</i> (µg/g CR) | 0.018  | 0.046  | 0.062   | 0.079   | 0.222   |
| Mercury (Hg) (ng/mL)          | 0.27   | 0.78   | 1.21    | 1.58    | 4.94    |
| <i>CR corrected</i> (µg/g CR) | 0.003  | 0.007  | 0.013   | 0.023   | 0.188   |
| Titanium (Ti) (ng/mL)         | 2.25   | 6.80   | 12.07   | 16.99   | 27.10   |
| <i>CR corrected</i> (µg/g CR) | 0.036  | 0.068  | 0.129   | 0.210   | 0.491   |
| Lead (Pb) (ng/mL)             | 0.25   | 0.25   | 0.50    | 0.52    | 5.80    |
| <i>CR corrected</i> (µg/g CR) | 0.001  | 0.003  | 0.005   | 0.010   | 0.086   |
| Antimony (Sb) (ng/mL)         |        |        |         |         |         |

*This table presents the distribution of the concentrations among sixty women undergoing IVF with a PGT-A and SET/FET [the minimum, maximum and quartile values (25%, 50%, and 75%) are indicated]. Urinary concentrations were corrected by creatine (CR) levels to account for urine dilution. Follicular fluid, urine and plasma non-essential trace metals concentrations are expressed as ng/mL. Creatinine corrected values are expressed as µg/g of creatinine (µg/g CR).*
